# Supplementary material
Source: HighWire-hosted journal article supplement (https://bmjopen.bmj.com/content/12/1/e055374)
Supplement: inline-supplementary-material-2 [file inline-supplementary-material-2.pdf]

## Supplement Table S1-1

Search methodology

Search strategies

---

1 diabetes. ab, kw, ti.

2 diabetes mellitus. ab, kw, ti.

3 "diabetic\*". ab, kw, ti.

4 1 or 2 or 3

5 mri. ab, kw, ti.

6 MR. ab, kw, ti.

7 "magnetic resonance imag\*". ab, kw, ti.

8 cardiac magnetic resonance. ab, kw, ti.

9 cmr. ab, kw, ti.

10 late gadolinium enhancement. ab, kw, ti.

11 lge. ab, kw, ti.

12 delayed gadolinium enhancement. ab, kw, ti.

13 5 or 6 or 7 or 8 or 9 or 10 or 11 or 12

14 prognosis. sh.

15 diagnosed. tw.

16 cohort:.mp.

17 predictor:.mp.

18 death.mp.

19 exp \*models, statistical/

20 14 or 15 or 16 or 17 or 18 or 19

21 4 and 13 and 20

22 limit 21 to English language [Limit not valid in CDSR, CCA, CLCMR; records were retained]

23 limit 22 to human [Limit not valid in CDSR, CCA, CLCMR; records were retained]

24 limit 23 to journal article [Limit not valid in CDSR, CCA, Embase; records were retained]

25 limit 24 to (embase or medline) [Limit not valid in CDSR, CCA, CLCMR, Ovid MEDLINE(R); records were retained]

---

1 to 25 were performed in OvidSP platform.

## Supplement Tab e S1-2

Search methodology

Search strategies

---

1 diabetes[Title/Abstract]

2 "diabetes mellitus"[Title/Abstract]

3 "diabetic\*"[Title/Abstract]

4 1 or 2 or 3

5 mri[Title/Abstract]

6 MR[Title/Abstract]

7 "magnetic resonance imag\*"[Title/Abstract]

8 "Magnetic Resonance Imaging"[MeSH Terms]

9 "cardiac magnetic resonance"[Title/Abstract]

10 cmr[Title/Abstract]

11 "late gadolinium enhancement" [Title/Abstract]

12 LGE[Title/Abstract]

13 "delayed gadolinium enhancement"[ Title/Abstract]

14 5 or 6 or 7 or 8 or 9 or 10 or 11 or 12 or 13

15 prognosis[ MeSH Terms]

16 diagnosed[Title/Abstract]

17 cohort:[MeSH Terms]

18 "predictor\*"[Title/Abstract]

19 death[MeSH Terms]

20 models, statistical[MeSH Terms]

21 15 or 16 or 17 or 18 or 19 or 20

22 4 and 14 and 21

23 "english and humans"[Filter]

24 22 and 23

25 journal article[Filter]

26 24 and 25

---

1 to 26 were performed in PubMed.

### Supplement Table S1-3

Search methodolog

Search strategies

---

1 diabetes:ti,ab,kw

2 "diabetes mellitus":ti,ab,kw

3 "diabetic\*":ti,ab,kw

4 1 or 2 or 3

5 mri:ti,ab,kw

6 MR:ti,ab,kw

7 "magnetic resonance imag\*":ti,ab,kw

8 "Magnetic Resonance Imaging"[MeSH Terms]

9 "cardiac magnetic resonance":ti,ab,kw

10 cmr:ti,ab,kw

11 "late gadolinium enhancement" :ti,ab,kw

12 LGE:ti,ab,kw

13 "delayed gadolinium enhancement":ti,ab,kw

14 5 or 6 or 7 or 8 or 9 or 10 or 11 or 12 or 13

15 prognosis[ MeSH Terms]

16 diagnosed:ti,ab,kw

17 cohort:[MeSH Terms]

18 "predictor\*":ti,ab,kw

19 death[MeSH Terms]

20 models, statistical[MeSH Terms]

21 15 or 16 or 17 or 18 or 19 or 20

22 4 and 14 and 21



---

1 to 26 were performed in Cochrane Library.
